# Supplementary material
Source: PubMed Central journal article supplement (PMC8484020)
Supplement: NIHMS1715207-supplement-1715207_Supp_info.pdf [file NIHMS1715207-supplement-1715207_Supp_info.pdf]

## SUPPLEMENTARY INFORMATION

### **Prognostic value of [<sup>18</sup>F]FDG PET/CT in patients with CNS lymphoma receiving ibrutinib-based therapies**

Simone Krebs<sup>1</sup>, Audrey Mauguen<sup>2</sup>, Onur Yildirim<sup>3</sup>, Vaios Hatzoglou<sup>3</sup>, Jasmine H. Francis<sup>4</sup>, Lauren R. Schaff<sup>5</sup>, Ingo K. Mellinghoff<sup>5</sup>, Heiko Schöder<sup>1†\*</sup>, Christian Grommes<sup>5†</sup>

<sup>1</sup>Molecular Imaging and Therapy Service, Department of Radiology, Memorial Sloan Kettering Cancer Center, New York, NY; <sup>2</sup>Department of Epidemiology and Biostatistics, Memorial Sloan Kettering Cancer Center, New York, NY; <sup>3</sup>Neuroradiology Service, Department of Radiology, Memorial Sloan Kettering Cancer Center, New York, NY; <sup>4</sup>Ophthalmic Oncology Service, Department of Surgery, Memorial Sloan Kettering Cancer Center, New York, NY; <sup>5</sup>Department of Neurology, Memorial Sloan Kettering Cancer Center, New York, NY

**\*Corresponding author:** Heiko Schöder, Molecular Imaging and Therapy Service, Memorial Sloan Kettering Cancer Center, 1275 York Ave, Box 77, New York, NY 10065; e-mail: [schoderh@mskcc.org](mailto:schoderh@mskcc.org)

†Contributed equally as senior authors

**FIGURES**

**Supplementary Fig. 1** Description of PET parameters in a representative patient example.

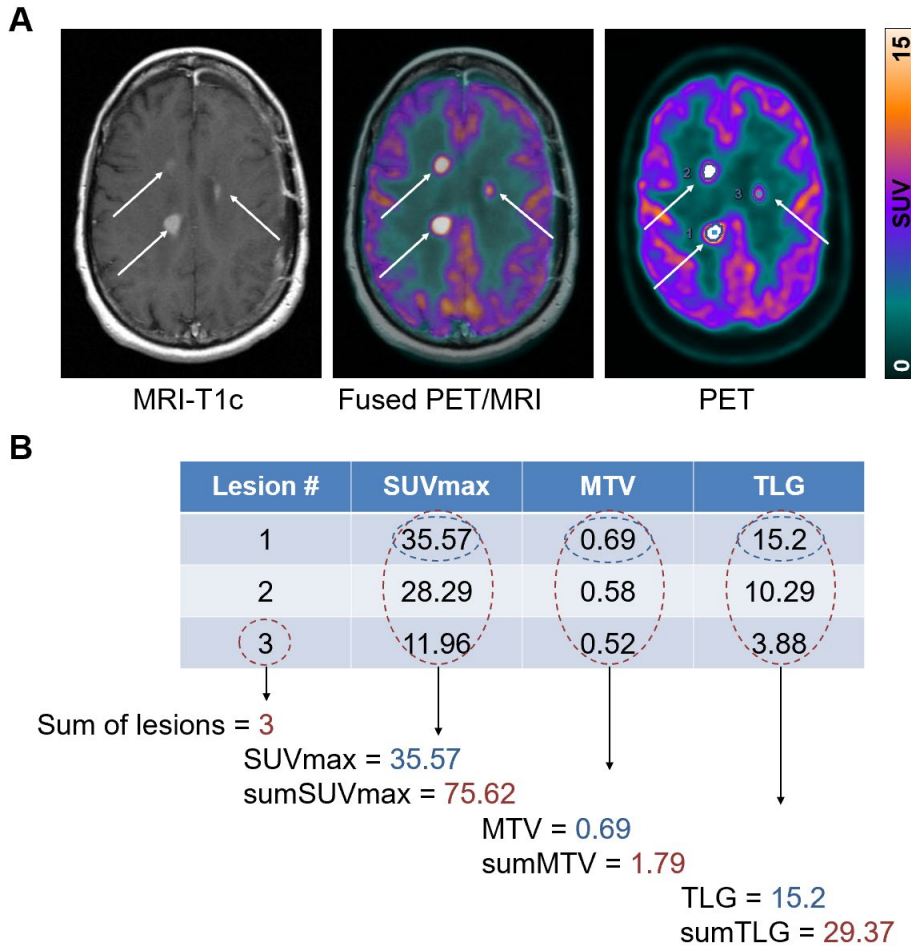

(A) Contrast-enhanced T1-weighted MRI depicts three enhancing lesions; axial fused PET/MRI and PET images confirming focal [<sup>18</sup>F]FDG uptake. (B) Display and calculation of PET parameters.

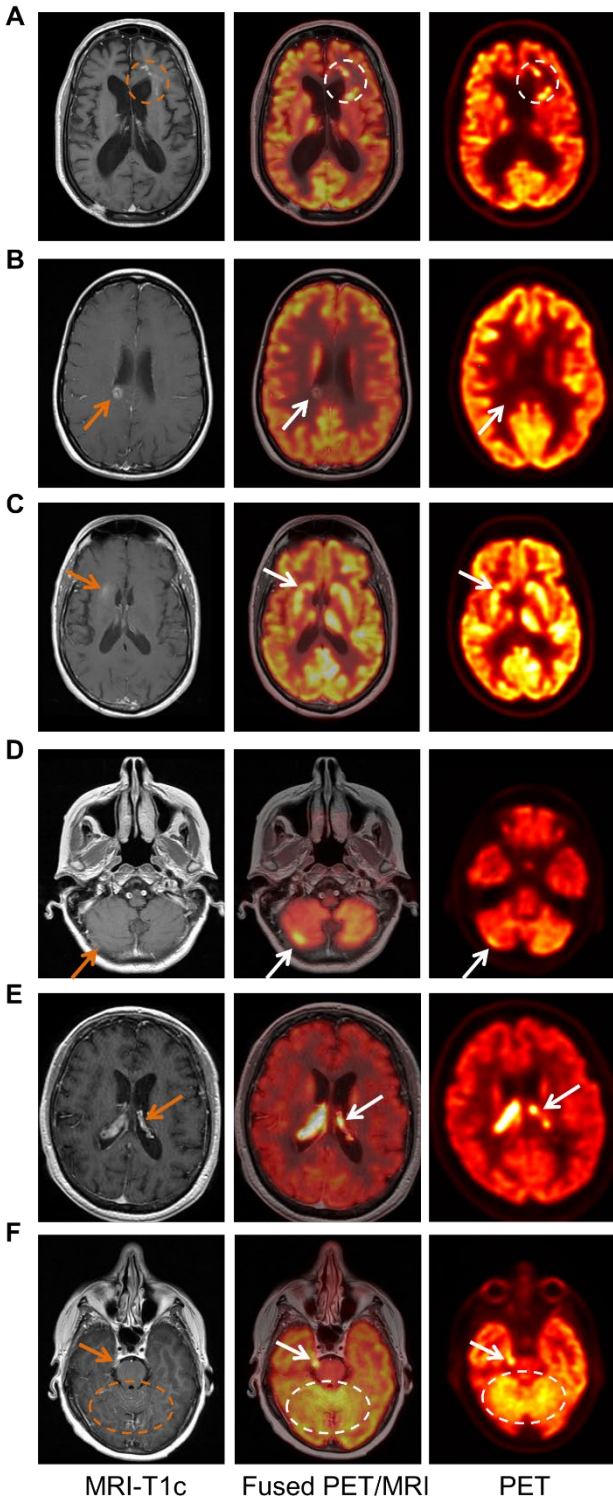

**Supplementary Fig. 2** Spectrum of imaging patterns in CNS lymphoma. Contrast-enhanced (CE) T1-weighted MRI (left), fused PET/MRI (mid), and PET images (right). (A) Heterogeneous lesion. (B) Nodular enhancing lesion in right posterior body of corpus callosum. (C) Ill-defined enhancement in right anterior basal ganglia, possibly obscured on PET by physiologic intense uptake. (D) Focal avidity in right cerebellar hemisphere without enhancement on MRI and without correlate on FLAIR images (not shown). (E) Lesion in choroid plexus in left ventricle better seen on PET than on MRI, possibly obscured by physiologic intense enhancement in choroid plexus. (F) Diffuse enhancement and thickening of bilateral cranial nerves V, most conspicuous on the right (arrow), showing uptake on PET. Leptomeningeal enhancement involving cerebellar folia (circle) shows elevated metabolic activity.

**Supplementary Fig. 3** Progression-free survival curve (Kaplan-Meier estimate) for the 53 patients.

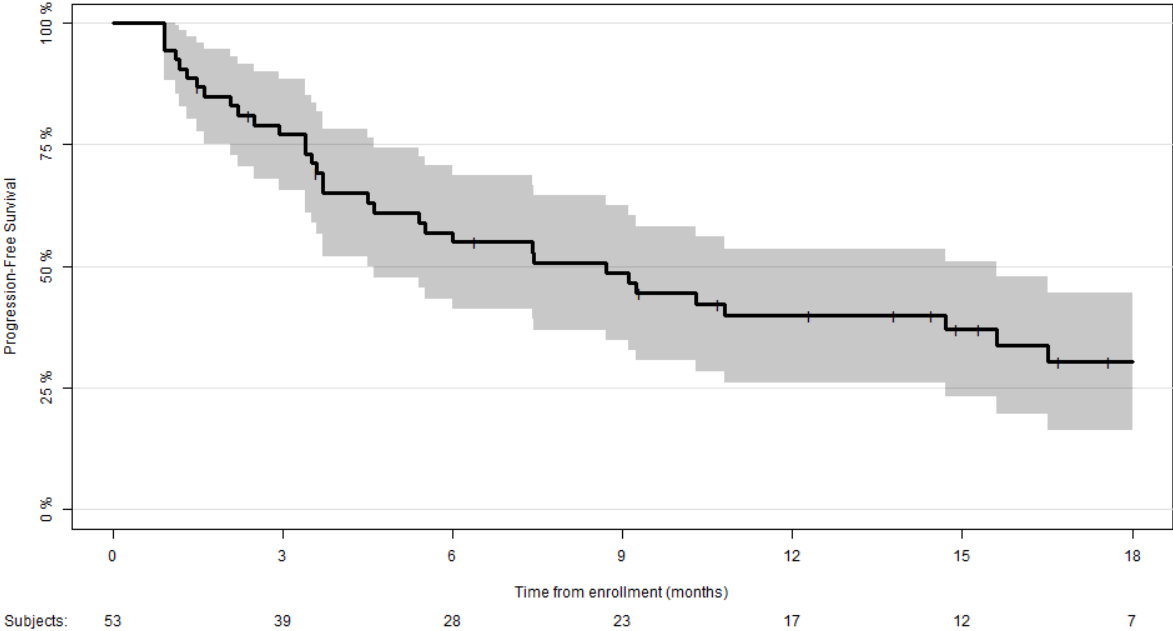

**Supplementary Fig. 4** Distribution of PET parameters by overall response rate (ORR) for the 38 patients with clearly PET-positive lesions. Center lines show the medians; box limits indicate the 25th and 75th percentiles; whiskers extend 1.5 times the interquartile range from the 25th and 75th percentiles. n =13 CR, 13 PR, 12 SD/PD.

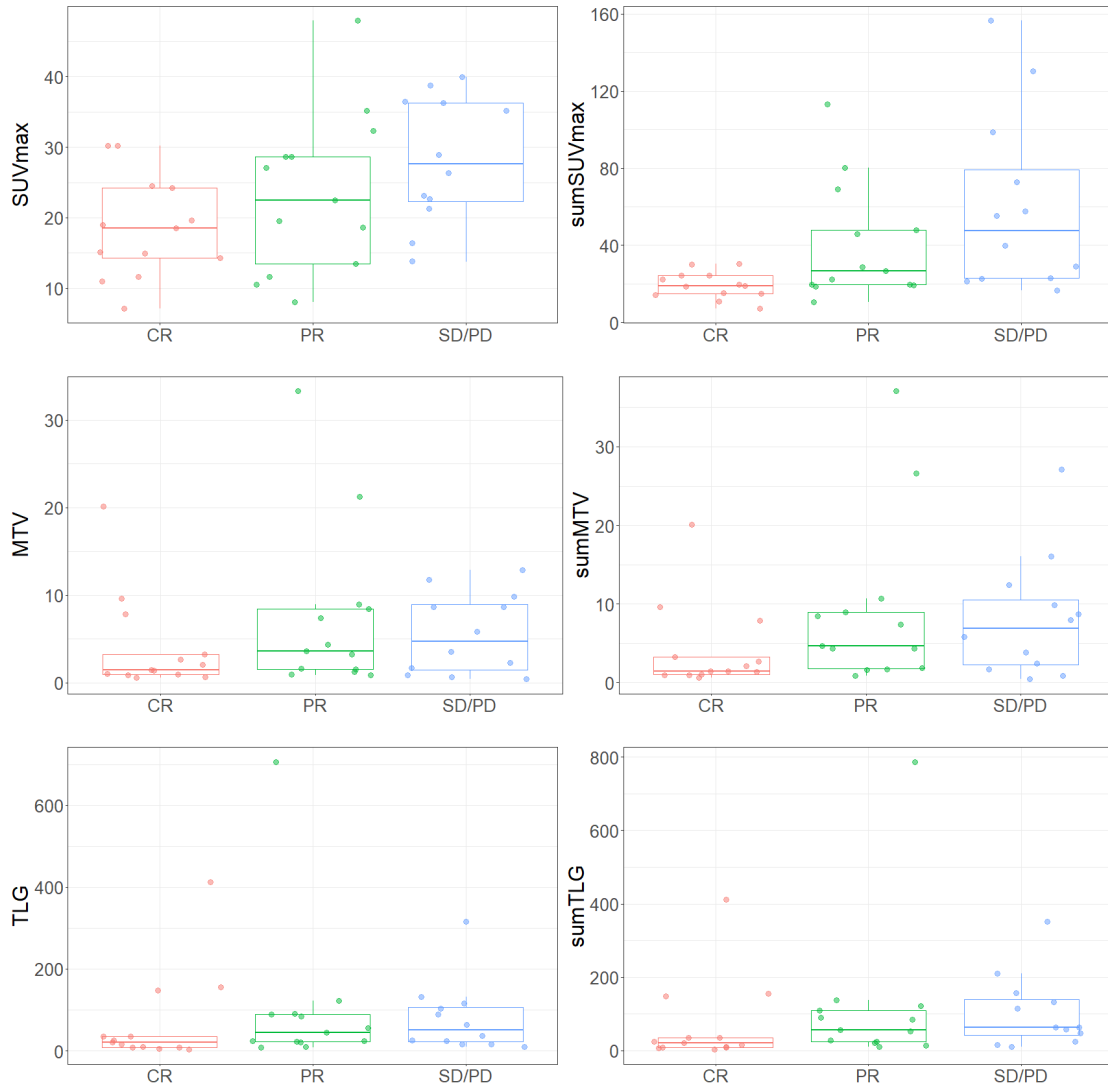

**Supplementary Fig. 5** Progression-free survival curve (Kaplan-Meier estimate) for the 38 patients with clearly PET-positive lesions.

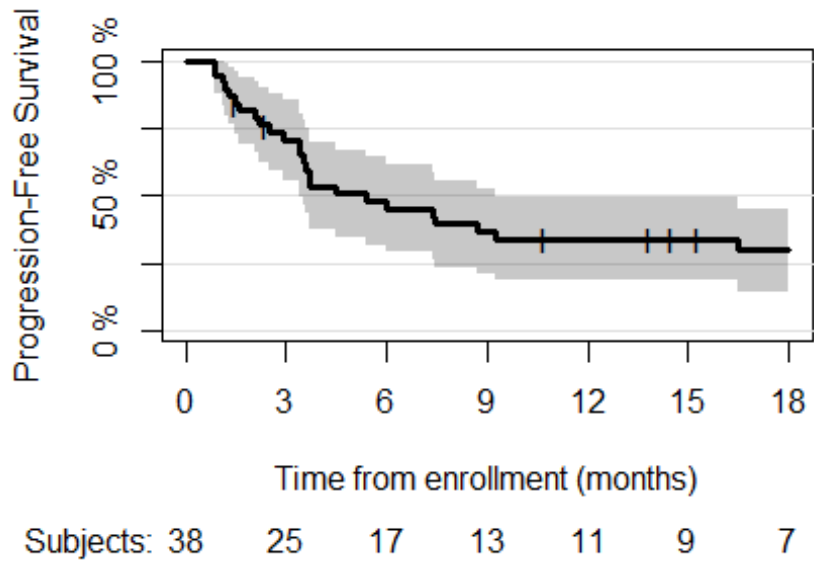

## TABLES

**Supplementary Table 1** Correlation between PET parameters and tumor volume for the 53 patients.

| <b>Parameters</b>     | <b>Spearman</b> | <b>95% CI Spearman</b> | <b>Pearson</b> | <b>95% CI Pearson</b> |
|-----------------------|-----------------|------------------------|----------------|-----------------------|
| sumSUV <sub>max</sub> | 0.631           | CI: 0.413 - 0.780      | 0.599          | CI: 0.392 - 0.748     |
| SUV <sub>max</sub>    | 0.640           | CI: 0.425 - 0.787      | 0.622          | CI: 0.423 - 0.764     |
| sumMTV                | 0.682           | CI: 0.482 - 0.815      | 0.594          | CI: 0.386 - 0.745     |
| MTV                   | 0.668           | CI: 0.463 - 0.805      | 0.586          | CI: 0.375 - 0.739     |
| sumTLG                | 0.714           | CI: 0.526 - 0.835      | 0.619          | CI: 0.419 - 0.762     |
| TLG                   | 0.704           | CI: 0.512 - 0.829      | 0.616          | CI: 0.415 - 0.760     |

CI = Confidence Interval.

**Supplementary Table 2** Distribution of PET parameters and MYD88 mutation status for the 53 patients.

| <b>Characteristic</b> | <b>Mutated, N =<br/>28<sup>1</sup></b> | <b>Wild Type, N =<br/>22<sup>1</sup></b> | <b>p-value<sup>2</sup></b> |
|-----------------------|----------------------------------------|------------------------------------------|----------------------------|
| sumSUV <sub>max</sub> | 19 (3, 130)                            | 20 (3, 157)                              | 0.89                       |
| SUV <sub>max</sub>    | 16 (3, 40)                             | 17 (3, 48)                               | 0.87                       |
| sumMTV                | 2 (0, 37)                              | 1 (0, 27)                                | 0.51                       |
| MTV                   | 1.9 (0.0, 33.3)                        | 1.0 (0.0, 11.7)                          | 0.44                       |
| sumTLG                | 25 (0, 787)                            | 20 (0, 209)                              | 0.50                       |
| TLG                   | 23 (0, 707)                            | 15 (0, 148)                              | 0.41                       |

<sup>1</sup>Statistics presented: median (minimum, maximum)

<sup>2</sup>Statistical tests performed: Wilcoxon rank-sum test



**Supplementary Table 3** Distribution of PET parameters and CD79B status for the 53 patients.

| <b>Characteristic</b> | <b>Mutated, N =<br/>21<sup>1</sup></b> | <b>Wild Type, N =<br/>30<sup>1</sup></b> | <b>p-value<sup>2</sup></b> |
|-----------------------|----------------------------------------|------------------------------------------|----------------------------|
| sumSUV <sub>max</sub> | 19 (3, 130)                            | 20 (3, 157)                              | 0.42                       |
| SUV <sub>max</sub>    | 16 (3, 40)                             | 17 (3, 48)                               | 0.61                       |
| sumMTV                | 2 (0, 20)                              | 3 (0, 37)                                | 0.24                       |
| MTV                   | 0.9 (0.0, 20.1)                        | 1.6 (0.0, 33.3)                          | 0.22                       |
| sumTLG                | 16 (0, 412)                            | 30 (0, 787)                              | 0.43                       |
| TLG                   | 16 (0, 412)                            | 24 (0, 707)                              | 0.39                       |

<sup>1</sup>Statistics presented: median (minimum, maximum)

<sup>2</sup>Statistical tests performed: Wilcoxon rank-sum test

**Supplementary Table 4** Summary of PET parameters by ORR for the 53 patients.

| <b>Characteristic</b> | <b>CR, N = 24<sup>1</sup></b> | <b>PR, N = 16<sup>1</sup></b> | <b>SD/PD, N = 13<sup>1</sup></b> |
|-----------------------|-------------------------------|-------------------------------|----------------------------------|
| sumSUV <sub>max</sub> | 9, (3, 19), (3-30)            | 21, (17, 46), (3-113)         | 40, (23, 73), (3-157)            |
| SUV <sub>max</sub>    | 9, (3, 19), (3-30)            | 19, (10, 29), (3-48)          | 26, (21, 36), (3-40)             |
| sumMTV                | 1, (0, 2), (0-20)             | 4, (1, 9), (0-37)             | 6, (2, 10), (0-27)               |
| MTV                   | 0.6, (0.0, 1.6), (0.0-20.1)   | 2.4, (0.9, 7.6), (0.0-33.3)   | 3.6, (0.9, 8.7), (0.0-12.8)      |
| sumTLG                | 5, (0, 22), (0-412)           | 40, (14, 95), (0-787)         | 63, (25, 132), (0-352)           |
| TLG                   | 4, (0, 22), (0-412)           | 24, (9, 85), (0-707)          | 37, (16, 102), (0-315)           |

<sup>1</sup>Statistics presented: median, (IQR), (minimum-maximum)

SD and PD were grouped as non-responders due to their small frequencies.

**Supplementary Table 5** Correlation between PET parameters and tumor volume for the 38 patients with clearly PET-positive lesions.

| <b>Parameters</b> | <b>Spearman</b> | <b>95%CI Spearman</b> | <b>Pearson</b> | <b>95%CI Pearson</b> |
|-------------------|-----------------|-----------------------|----------------|----------------------|
| sum SUVmax        | 0.394           | CI: 0.072 - 0.641     | 0.415          | CI: 0.11 - 0.649     |
| max SUVmax        | 0.395           | CI: 0.074 - 0.642     | 0.505          | CI: 0.221 - 0.71     |
| sum MTV           | 0.558           | CI: 0.267 - 0.756     | 0.402          | CI: 0.094 - 0.639    |
| max MTV           | 0.532           | CI: 0.235 - 0.738     | 0.381          | CI: 0.07 - 0.625     |
| sum TLG           | 0.612           | CI: 0.337 - 0.791     | 0.526          | CI: 0.248 - 0.724    |
| max TLG           | 0.597           | CI: 0.318 - 0.781     | 0.507          | CI: 0.224 - 0.711    |

**Supplementary Table 6** Distribution of PET parameters and MYD88 mutation status for the 38 patients with clearly PET-positive lesions.

| <b>Characteristic</b> | <b>MUT, N = 21<sup>1</sup></b> | <b>WT, N = 15<sup>1</sup></b> | <b>p-value<sup>2</sup></b> |
|-----------------------|--------------------------------|-------------------------------|----------------------------|
| sum SUVmax            | 23 (7, 130)                    | 24 (11, 157)                  | 0.37                       |
| max SUVmax            | 20 (7, 40)                     | 23 (11, 48)                   | 0.70                       |
| sum MTV               | 6 (0, 37)                      | 4 (1, 27)                     | 0.70                       |
| max MTV               | 3.6 (0.4, 33.3)                | 2.3 (0.7, 11.7)               | 0.57                       |
| sum TLG               | 56 (2, 787)                    | 53 (8, 209)                   | 0.68                       |
| max TLG               | 45 (2, 707)                    | 24 (5, 148)                   | 0.51                       |

<sup>1</sup>Statistics presented: median (minimum, maximum)

<sup>2</sup>Statistical tests performed: Wilcoxon rank-sum test

**Supplementary Table 7** Distribution of PET parameters and CD79B status for the 38 patients with clearly PET-positive lesions.

| <b>Characteristic</b> | <b>MUT, N = 14<sup>1</sup></b> | <b>WT, N = 23<sup>1</sup></b> | <b>p-value<sup>2</sup></b> |
|-----------------------|--------------------------------|-------------------------------|----------------------------|
| sum SUVmax            | 25 (7, 130)                    | 23 (11, 157)                  | 0.75                       |
| max SUVmax            | 21 (7, 40)                     | 23 (8, 48)                    | 0.90                       |
| sum MTV               | 3 (0, 20)                      | 4 (1, 37)                     | 0.36                       |
| max MTV               | 2.7 (0.4, 20.1)                | 3.3 (0.7, 33.3)               | 0.31                       |
| sum TLG               | 31 (2, 412)                    | 56 (7, 787)                   | 0.77                       |
| max TLG               | 30 (2, 412)                    | 35 (5, 707)                   | 0.70                       |

<sup>1</sup>Statistics presented: median (minimum, maximum)

<sup>2</sup>Statistical tests performed: Wilcoxon rank-sum test

**Supplementary Table 8** Summary of PET parameters by ORR for the 38 patients with clearly PET-positive lesions.

| <b>Characteristic</b> | <b>CR, N = 13<sup>1</sup></b> | <b>PR, N = 13<sup>1</sup></b> | <b>SD/PD, N = 12<sup>1</sup></b> |
|-----------------------|-------------------------------|-------------------------------|----------------------------------|
| sum SUVmax            | 19, (15, 24), (7-30)          | 27, (20, 48), (11-113)        | 48, (23, 79), (16-157)           |
| max SUVmax            | 19, (14, 24), (7-30)          | 22, (13, 29), (8-48)          | 28, (22, 36), (14-40)            |
| sum MTV               | 1, (1, 3), (1-20)             | 5, (2, 9), (1-37)             | 7, (2, 11), (0-27)               |
| max MTV               | 1.4, (1.0, 3.3), (0.6-20.1)   | 3.6, (1.6, 8.4), (0.9-33.3)   | 4.7, (1.5, 9.0), (0.4-12.8)      |
| sum TLG               | 21, (9, 35), (2-412)          | 56, (24, 110), (10-787)       | 63, (42, 139), (10-352)          |
| max TLG               | 21, (8, 35), (2-412)          | 45, (22, 90), (8-707)         | 50, (22, 106), (10-315)          |

<sup>1</sup>Statistics presented: median, (IQR), (minimum-maximum)

SD and PD were grouped as non-responders due to their small frequencies.

**Supplementary Table 9** Univariable PFS analysis for the PET parameters for the 38 patients with clearly PET-positive lesions.

| <b>Characteristic</b> | <b>HR<sup>1</sup></b> | <b>95% CI<sup>1</sup></b> | <b>p-value</b> |
|-----------------------|-----------------------|---------------------------|----------------|
| max SUVmax            | 1.04                  | 1.00, 1.09                | 0.04           |
| sum SUVmax            | 1.02                  | 1.01, 1.03                | 0.005          |
| log-max MTV           | 1.10                  | 0.77, 1.57                | 0.60           |
| log-sum MTV           | 1.22                  | 0.86, 1.73                | 0.26           |
| log-max TLG           | 1.09                  | 0.83, 1.45                | 0.54           |
| log-sum TLG           | 1.18                  | 0.89, 1.56                | 0.25           |

<sup>1</sup>HR = Hazard Ratio, CI = Confidence Interval

**Supplementary Table 10** Univariable PFS analysis for the clinical parameters for the 38 patients with clearly PET-positive lesions.

| <b>Characteristic</b>                          | <b>N</b> | <b>HR<sup>1</sup></b> | <b>95% CI<sup>1</sup></b> | <b>p-value</b> |
|------------------------------------------------|----------|-----------------------|---------------------------|----------------|
| <b>Age</b>                                     | 38       | 0.98                  | 0.94, 1.01                | 0.20           |
| <b>ECOG</b>                                    | 38       |                       |                           | 0.84           |
| 0                                              |          | Ref.                  |                           |                |
| 1                                              |          | 1.30                  | 0.47, 3.60                |                |
| 2                                              |          | 1.06                  | 0.28, 3.96                |                |
| <b>Treatment</b>                               | 38       |                       |                           | 0.02           |
| Combination                                    |          | Ref.                  |                           |                |
| Single agent                                   |          | 2.95                  | 1.09, 7.98                |                |
| <b>MYD88</b>                                   | 36       |                       |                           | 0.82           |
| MUT                                            |          | Ref.                  |                           |                |
| WT                                             |          | 0.91                  | 0.40, 2.08                |                |
| <b>CD79B</b>                                   | 37       |                       |                           | 0.85           |
| MUT                                            |          | Ref.                  |                           |                |
| WT                                             |          | 1.08                  | 0.47, 2.48                |                |
| <b>N lesions</b>                               | 38       |                       |                           | 0.11           |
| 1                                              |          | Ref.                  |                           |                |
| 2+                                             |          | 1.95                  | 0.88, 4.35                |                |
| <b>log-Total tumor volume (cm<sup>3</sup>)</b> | 38       | 1.15                  | 0.94, 1.40                | 0.15           |

<sup>1</sup>HR = Hazard Ratio, CI = Confidence Interval



**Supplementary Table 11** Multivariable analysis for PFS for the 38 patients with clearly PET-positive lesions.

| <b>Characteristic</b>                            | <b>HR<sup>1</sup></b> | <b>95% CI<sup>1</sup></b> | <b>p-value</b> |
|--------------------------------------------------|-----------------------|---------------------------|----------------|
| <b>sum SUVmax</b> (for 5 units)                  | 1.11                  | 1.01, 1.22                | 0.03           |
| <b>log-sum MTV</b>                               | 1.46                  | 0.44, 4.77                | 0.54           |
| <b>log-sum TLG</b>                               | 0.65                  | 0.25, 1.70                | 0.38           |
| <b>Treatment</b>                                 |                       |                           | 0.11           |
| Combination                                      | Ref.                  |                           |                |
| Single agent                                     | 2.43                  | 0.77, 7.67                |                |
| <b>N lesions</b>                                 |                       |                           | 0.56           |
| 1                                                | Ref.                  |                           |                |
| 2+                                               | 0.66                  | 0.16, 2.76                |                |
| <b>log-Total tumor volume</b> (cm <sup>3</sup> ) | 1.04                  | 0.79, 1.37                | 0.78           |

<sup>1</sup>HR = Hazard Ratio, CI = Confidence Interval

**Supplementary Table 12** Multivariable analysis for PFS (reduced Cox model after variable selection) for the 38 patients with clearly PET-positive lesions.

| <b>Characteristic</b>    | <b>HR<sup>1</sup></b> | <b>95% CI<sup>1</sup></b> | <b>p-value</b> |
|--------------------------|-----------------------|---------------------------|----------------|
| sum SUVmax (for 5 units) | 1.09                  | 1.03, 1.16                | 0.005          |

<sup>1</sup>HR = Hazard Ratio, CI = Confidence Interval
